# Supplementary material for: Co-crystallising two functional complex molecules in a terpyridine embrace lattice
Source: Royal Society of Chemistry journal article supplement (doi:10.1039/b904528g), 2009-01-01
Supplement: b904528g.pdf [file b904528g.pdf]

## Co-crystallising Two Functional Complex Molecules in a Terpyridine Embrace Lattice

Clare A. Tovee,<sup>a</sup> Colin A. Kilner,<sup>a</sup> James A. Thomas<sup>b</sup> and Malcolm A. Halcrow<sup>\*a</sup>

<sup>a</sup>*School of Chemistry, University of Leeds, Woodhouse Lane, Leeds, UK LS2 9JT.  
E-mail: m.a.halcrow@leeds.ac.uk*

<sup>b</sup>*Department of Chemistry, University of Sheffield, Sheffield, UK S3 7HF*

### Electronic Supplementary Information

#### Experimental details for the crystal structure determinations

**Figure S1** View of the complex dications in [Fe(bpp)<sub>2</sub>][BF<sub>4</sub>]<sub>2</sub> (left) and [Ru(terpy)<sub>2</sub>][BF<sub>4</sub>]<sub>2</sub>.

**Table S1** Selected bond lengths and angles in the crystal structures in this work.

**Figure S2** Full <sup>1</sup>H NMR spectrum of a solution of [Fe(bpp)<sub>2</sub>][BF<sub>4</sub>]<sub>2</sub> and [Ru(terpy)<sub>2</sub>][BF<sub>4</sub>]<sub>2</sub> in CD<sub>3</sub>NO<sub>2</sub>.

**Figure S3** Diamagnetic region of the <sup>1</sup>H NMR spectrum of a solution of [Fe(bpp)<sub>2</sub>][BF<sub>4</sub>]<sub>2</sub> and [Ru(terpy)<sub>2</sub>][BF<sub>4</sub>]<sub>2</sub> in CD<sub>3</sub>NO<sub>2</sub>, run 1 hr and 7 days after mixing.

**Figure S4** Comparison of the room-temperature powder diffraction data for [Fe(bpp)<sub>2</sub>][BF<sub>4</sub>]<sub>2</sub>, [Ru(terpy)<sub>2</sub>][BF<sub>4</sub>]<sub>2</sub> and two [Fe(bpp)<sub>2</sub>]<sub>x</sub>[Ru(terpy)<sub>2</sub>]<sub>1-x</sub>[BF<sub>4</sub>]<sub>2</sub> compositions.

**Table S2** Predicted and observed values of  $\chi_{\text{M}}T$  (cm<sup>3</sup> mol<sup>-1</sup> K) in the high and low-spin materials, based on the analytical compositions of the samples.

**Figure S5** Warming mode magnetic data for [Fe(bpp)<sub>2</sub>]<sub>x</sub>[Ru(terpy)<sub>2</sub>]<sub>1-x</sub>[BF<sub>4</sub>]<sub>2</sub>, replotted as a function of the high-spin fraction of the material vs. *T* to highlight the unusual variation of *T*<sub>1/2</sub> with composition.

**Figure S6** Emission spectra of solid [Fe(bpp)<sub>2</sub>]<sub>x</sub>[Ru(terpy)<sub>2</sub>]<sub>1-x</sub>[BF<sub>4</sub>]<sub>2</sub> at 77 K.

**Figure S7** Selected powder diffraction data from the [Fe<sub>y</sub>Ni<sub>1-y</sub>(bpp)<sub>2</sub>][BF<sub>4</sub>]<sub>2</sub> compounds in this work.

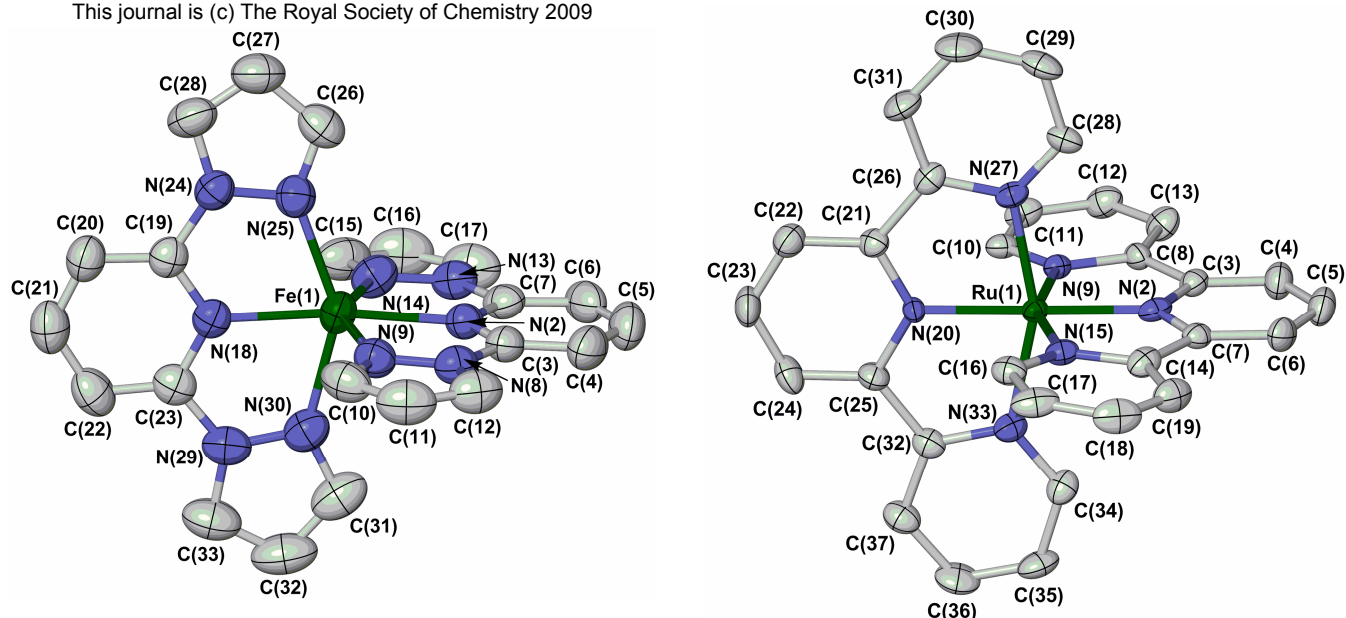

**Fig. S1** View of the complex dications in  $[\text{Fe}(\text{bpp})_2][\text{BF}_4]_2$  (left) and  $[\text{Ru}(\text{terpy})_2][\text{BF}_4]_2$  (right), showing the full atom numbering scheme employed. All H atoms have been omitted for clarity, and thermal ellipsoids are at the 50% probability level.

**Table S1** Selected bond lengths and angles in the crystal structures in this work ( $\text{\AA}$ ,  $^\circ$ ).

| $[\text{Fe}(\text{bpp})_2][\text{BF}_4]_2$ (high spin, from $\text{MeNO}_2/\text{Et}_2\text{O}$ ) |            | $[\text{Ru}(\text{terpy})_2][\text{BF}_4]_2$ |            |
|---------------------------------------------------------------------------------------------------|------------|----------------------------------------------|------------|
| Fe(1)–N(2)                                                                                        | 2.1464(18) | Ru(1)–N(2)                                   | 1.999(8)   |
| Fe(1)–N(9)                                                                                        | 2.205(2)   | Ru(1)–N(9)                                   | 2.098(4)   |
| Fe(1)–N(14)                                                                                       | 2.176(2)   | Ru(1)–N(15)                                  | 2.092(5)   |
| Fe(1)–N(18)                                                                                       | 2.1444(19) | Ru(1)–N(20)                                  | 2.017(7)   |
| Fe(1)–N(25)                                                                                       | 2.192(2)   | Ru(1)–N(27)                                  | 2.099(5)   |
| Fe(1)–N(30)                                                                                       | 2.190(3)   | Ru(1)–N(33)                                  | 2.102(5)   |
|                                                                                                   |            |                                              |            |
| N(2)–Fe(1)–N(9)                                                                                   | 73.15(8)   | N(2)–Ru(1)–N(9)                              | 78.9(3)    |
| N(2)–Fe(1)–N(14)                                                                                  | 73.70(8)   | N(2)–Ru(1)–N(15)                             | 78.5(3)    |
| N(2)–Fe(1)–N(18)                                                                                  | 173.18(10) | N(2)–Ru(1)–N(20)                             | 178.9(4)   |
| N(2)–Fe(1)–N(25)                                                                                  | 113.43(9)  | N(2)–Ru(1)–N(27)                             | 100.5(2)   |
| N(2)–Fe(1)–N(30)                                                                                  | 100.11(9)  | N(2)–Ru(1)–N(33)                             | 101.3(2)   |
| N(9)–Fe(1)–N(14)                                                                                  | 146.80(9)  | N(9)–Ru(1)–N(15)                             | 157.38(18) |
| N(9)–Fe(1)–N(18)                                                                                  | 104.67(8)  | N(9)–Ru(1)–N(20)                             | 100.0(2)   |
| N(9)–Fe(1)–N(25)                                                                                  | 98.69(8)   | N(9)–Ru(1)–N(27)                             | 91.94(17)  |
| N(9)–Fe(1)–N(30)                                                                                  | 92.86(8)   | N(9)–Ru(1)–N(33)                             | 93.68(18)  |
| N(14)–Fe(1)–N(18)                                                                                 | 108.06(8)  | N(15)–Ru(1)–N(20)                            | 102.6(2)   |
| N(14)–Fe(1)–N(25)                                                                                 | 95.93(9)   | N(15)–Ru(1)–N(27)                            | 91.49(18)  |
| N(14)–Fe(1)–N(30)                                                                                 | 91.19(9)   | N(15)–Ru(1)–N(33)                            | 91.38(18)  |
| N(18)–Fe(1)–N(25)                                                                                 | 73.16(9)   | N(20)–Ru(1)–N(27)                            | 79.3(2)    |
| N(18)–Fe(1)–N(30)                                                                                 | 73.40(9)   | N(20)–Ru(1)–N(33)                            | 78.9(2)    |
| N(25)–Fe(1)–N(30)                                                                                 | 146.39(9)  | N(27)–Ru(1)–N(33)                            | 158.17(18) |

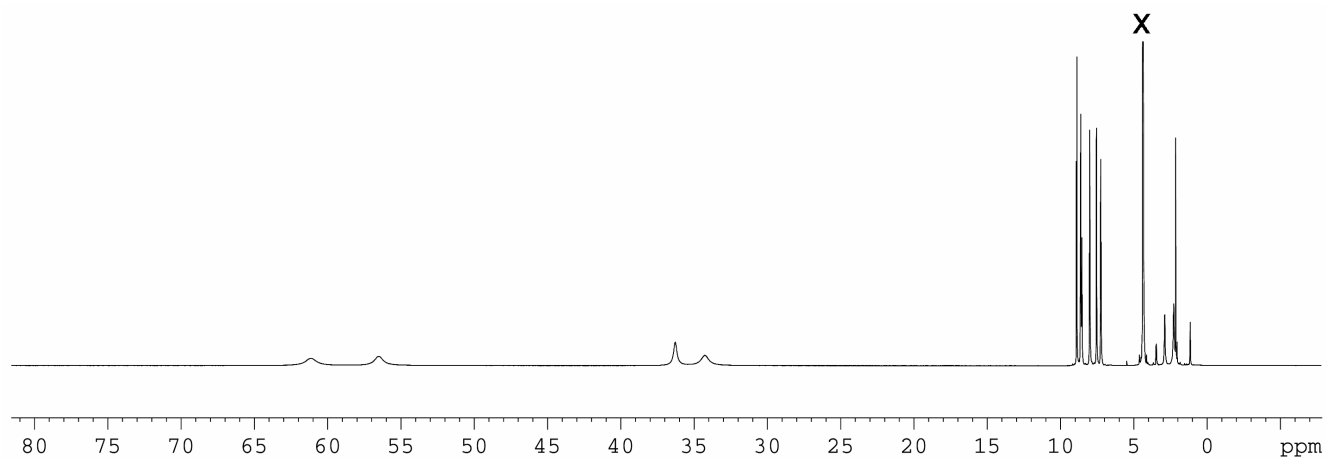

**Figure S2** Full <sup>1</sup>H NMR spectrum of a solution of [Fe(bpp)<sub>2</sub>][BF<sub>4</sub>]<sub>2</sub> and [Ru(terpy)<sub>2</sub>][BF<sub>4</sub>]<sub>2</sub> in CD<sub>3</sub>NO<sub>2</sub>, taken 1 hr after mixing, showing a mixture of paramagnetic peaks from the iron complex and diamagnetic peaks from the ruthenium compound.

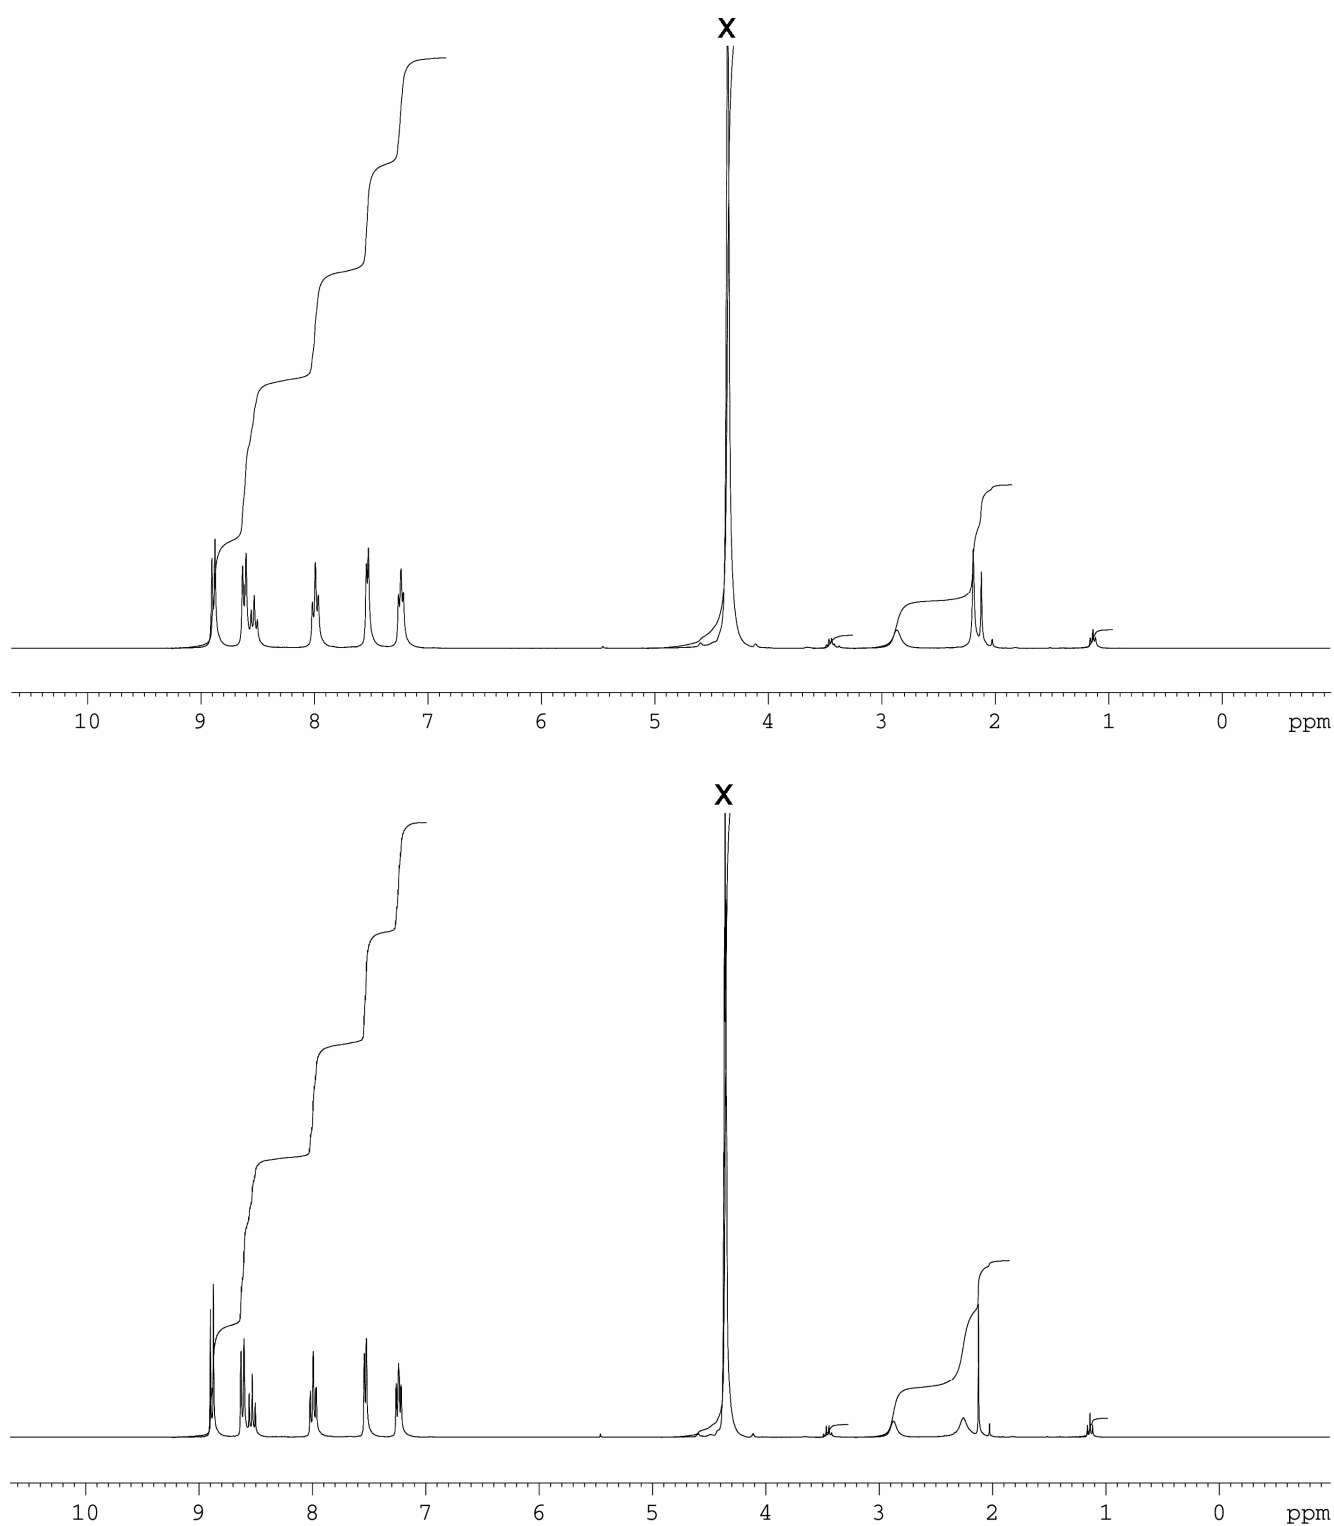

**Figure S3** Diamagnetic region of the  $^1\text{H}$  NMR spectrum of the same solution of  $[\text{Fe}(\text{bpp})_2][\text{BF}_4]_2$  and  $[\text{Ru}(\text{terpy})_2][\text{BF}_4]_2$  in  $\text{CD}_3\text{NO}_2$ , run 1 hr (top) and 7 days (bottom) after mixing. The identical nature of these spectra shows that bpp and terpy ligand exchange between iron and ruthenium centres does not take place on this timescale.

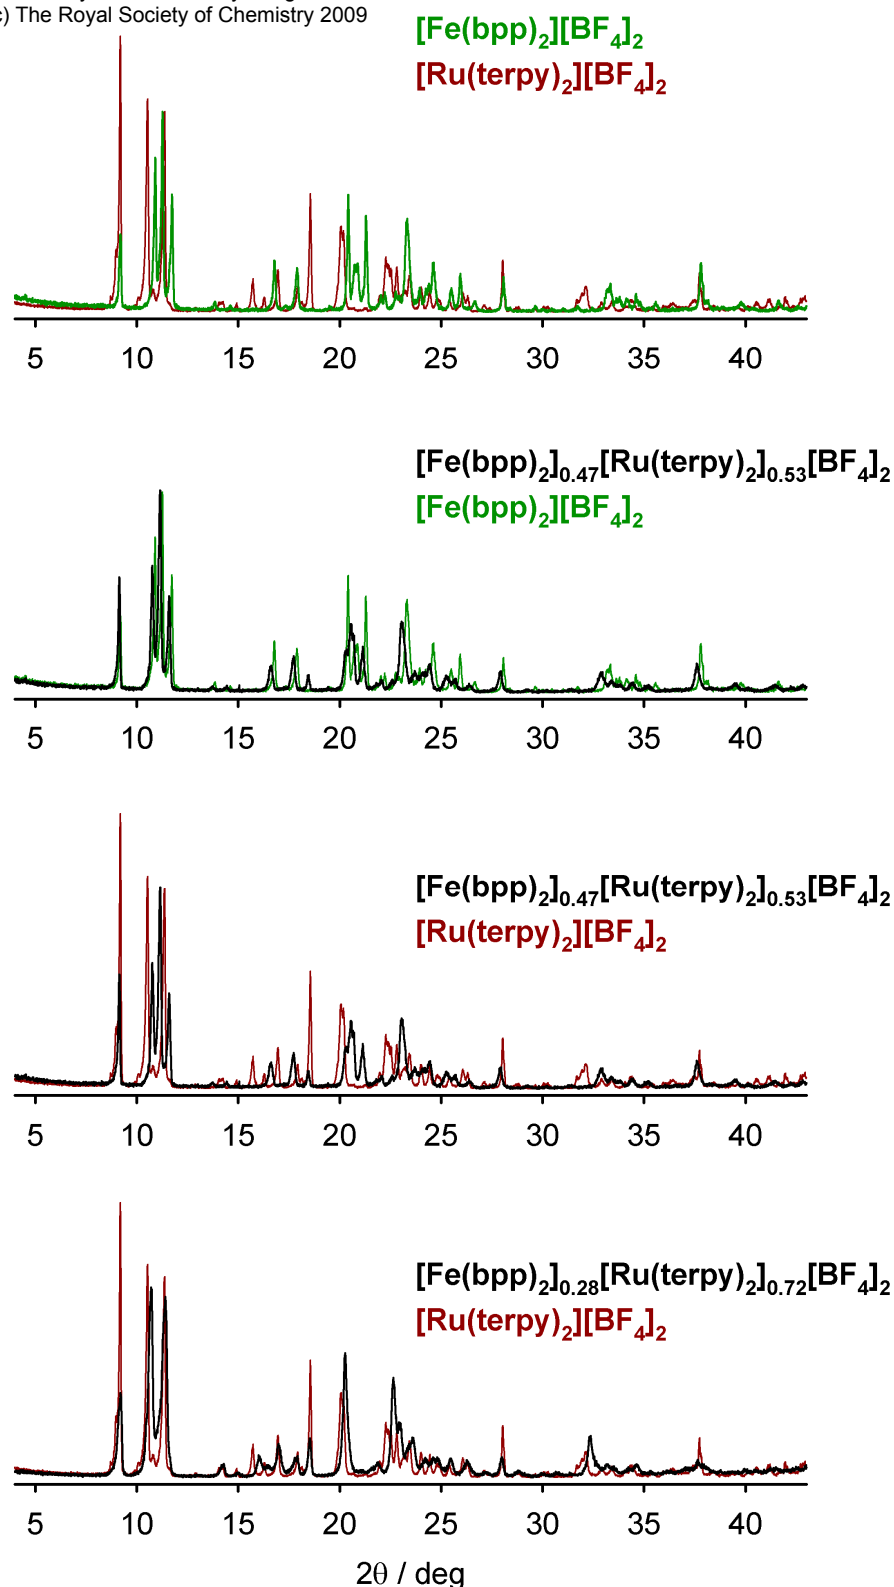

**Figure S4** Comparison of the room-temperature powder diffraction data for pure [Fe(bpp)<sub>2</sub>][BF<sub>4</sub>]<sub>2</sub> (green), pure [Ru(terpy)<sub>2</sub>][BF<sub>4</sub>]<sub>2</sub> (red), and two [Fe(bpp)<sub>2</sub>]<sub>x</sub>[Ru(terpy)<sub>2</sub>]<sub>1-x</sub>[BF<sub>4</sub>]<sub>2</sub> compositions (black).

The [Fe(bpp)<sub>2</sub>][BF<sub>4</sub>]<sub>2</sub> and [Ru(terpy)<sub>2</sub>][BF<sub>4</sub>]<sub>2</sub> powder patterns are clearly distinguishable (top), and data from [Fe(bpp)<sub>2</sub>]<sub>0.47</sub>[Ru(terpy)<sub>2</sub>]<sub>0.53</sub>[BF<sub>4</sub>]<sub>2</sub> match for the [Fe(bpp)<sub>2</sub>][BF<sub>4</sub>]<sub>2</sub> structure much more closely than the [Ru(terpy)<sub>2</sub>][BF<sub>4</sub>]<sub>2</sub> structure (the two centre graphs). The weak diffraction peak at 2θ = 18° in the solid solution, that does not have an obvious partner in the data from the iron complex, is evidence for contamination by a fraction of the *Cc* phase however. In contrast, data from [Fe(bpp)<sub>2</sub>]<sub>0.28</sub>[Ru(terpy)<sub>2</sub>]<sub>0.72</sub>[BF<sub>4</sub>]<sub>2</sub> are a close match for pure [Ru(terpy)<sub>2</sub>][BF<sub>4</sub>]<sub>2</sub> (bottom).

**Table S2** Predicted and observed values of  $\chi_M T$  ( $\text{cm}^3 \text{mol}^{-1} \text{K}$ ) from the high- and low-spin samples, based on the analytical compositions of the samples. The calculations use the following  $\chi_M T$  values for the pure components of the solid solutions; high-spin  $[\text{Fe}(\text{bpp})_2][\text{BF}_4]_2$ , = 3.5; low-spin  $[\text{Fe}(\text{bpp})_2][\text{BF}_4]_2$ , 0;  $[\text{Ru}(\text{terpy})_2][\text{BF}_4]_2$ , 0;  $[\text{Ni}(\text{bpp})_2][\text{BF}_4]_2$ , 1.2.

| $[\text{Fe}(\text{bpp})_2]_x[\text{Ru}(\text{terpy})_2]_{1-x}[\text{BF}_4]_2$ |                 |                        |                  |                         |
|-------------------------------------------------------------------------------|-----------------|------------------------|------------------|-------------------------|
| $x$                                                                           | Low-spin (calc) | $T = 50\text{K}$ (obs) | High-spin (calc) | $T = 340\text{K}$ (obs) |
| 0.95                                                                          | 0               | 0.06                   | 3.33             | 3.36                    |
| 0.75                                                                          | 0               | 0.01                   | 2.63             | 2.52                    |
| 0.57                                                                          | 0               | 0.02                   | 1.99             | 1.93                    |
| 0.47                                                                          | 0               | 0.02                   | 1.65             | 1.59                    |
| 0.28                                                                          | 0               | 0.02                   | 0.98             | 0.88                    |

| $[\text{Fe}_y\text{Ni}_{1-y}(\text{bpp})_2][\text{BF}_4]_2$ |                 |                        |                  |                         |
|-------------------------------------------------------------|-----------------|------------------------|------------------|-------------------------|
| $y$                                                         | Low-spin (calc) | $T = 50\text{K}$ (obs) | High-spin (calc) | $T = 300\text{K}$ (obs) |
| 0.95                                                        | 0.06            | 0.07                   | 3.39             | 3.36                    |
| 0.83                                                        | 0.20            | 0.18                   | 3.11             | 3.21                    |
| 0.68                                                        | 0.38            | 0.38                   | 2.76             | 2.65                    |
| 0.50                                                        | 0.60            | 0.61                   | 2.36             | 2.21                    |
| 0.30                                                        | 0.84            | 0.82                   | 1.87             | 1.71                    |
| 0.15                                                        | 1.02            | 1.03                   | 1.56             | 1.49                    |

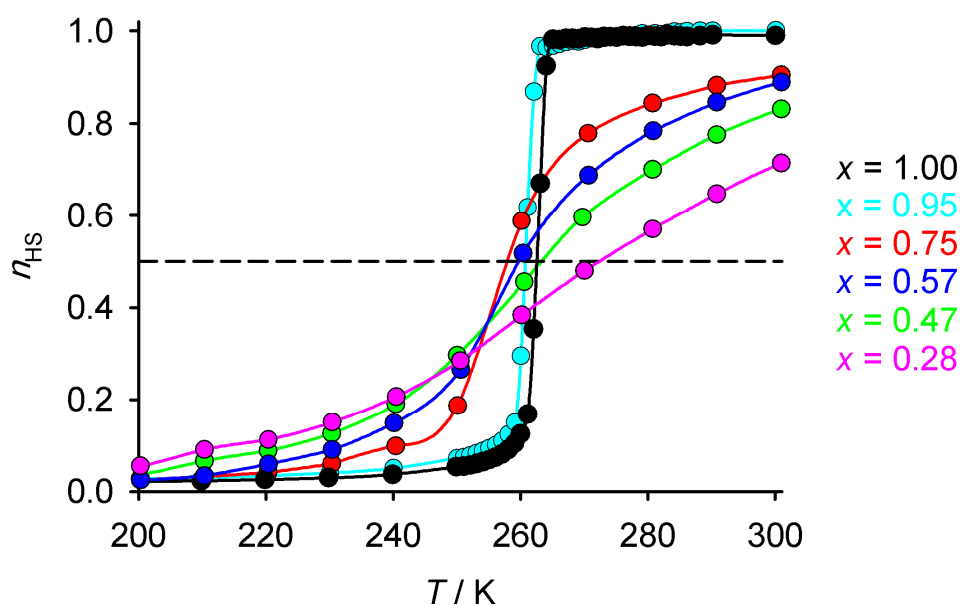

**Figure S5** Warming mode magnetic data for  $[\text{Fe}(\text{bpp})_2]_x[\text{Ru}(\text{terpy})_2]_{1-x}[\text{BF}_4]_2$ , replotted as a function of the high-spin fraction of the material ( $n_{\text{HS}}$ ) vs.  $T$  to highlight the unusual variation of  $T_{1/2}$  with composition. The midpoint-fraction  $n_{\text{HS}} = 0.5$  is highlighted with a dotted line, and the data points for each compound are linked with a simple spline curve for clarity.

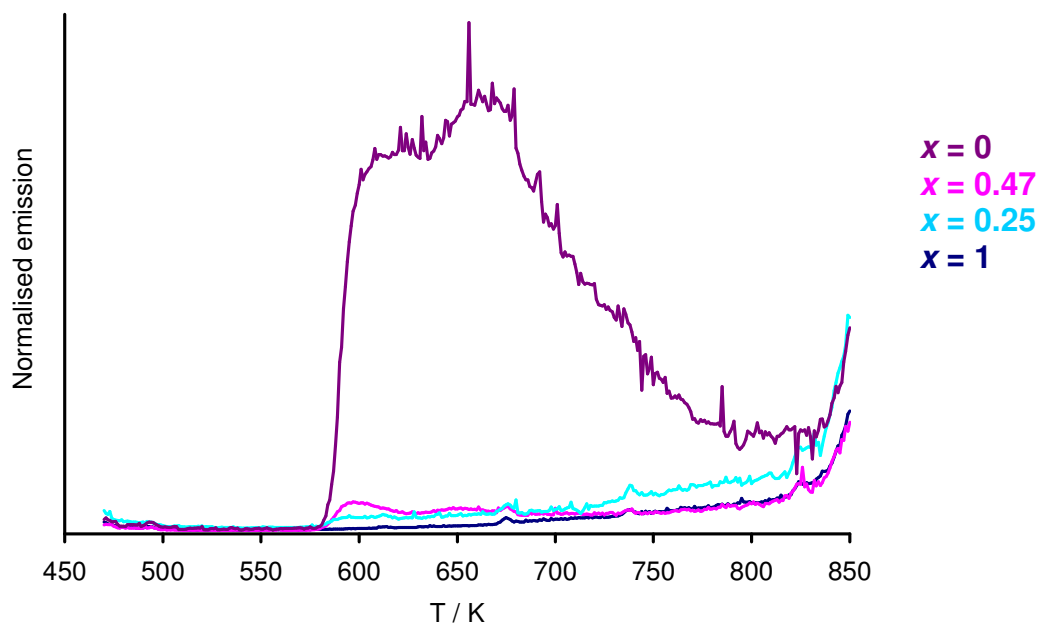

**Figure S6** Emission spectra of selected solid  $[\text{Fe}(\text{bpp})_2]_x[\text{Ru}(\text{terpy})_2]_{1-x}[\text{BF}_4]_2$  compounds at 77 K. All four spectra are plotted to the same vertical emission scale.

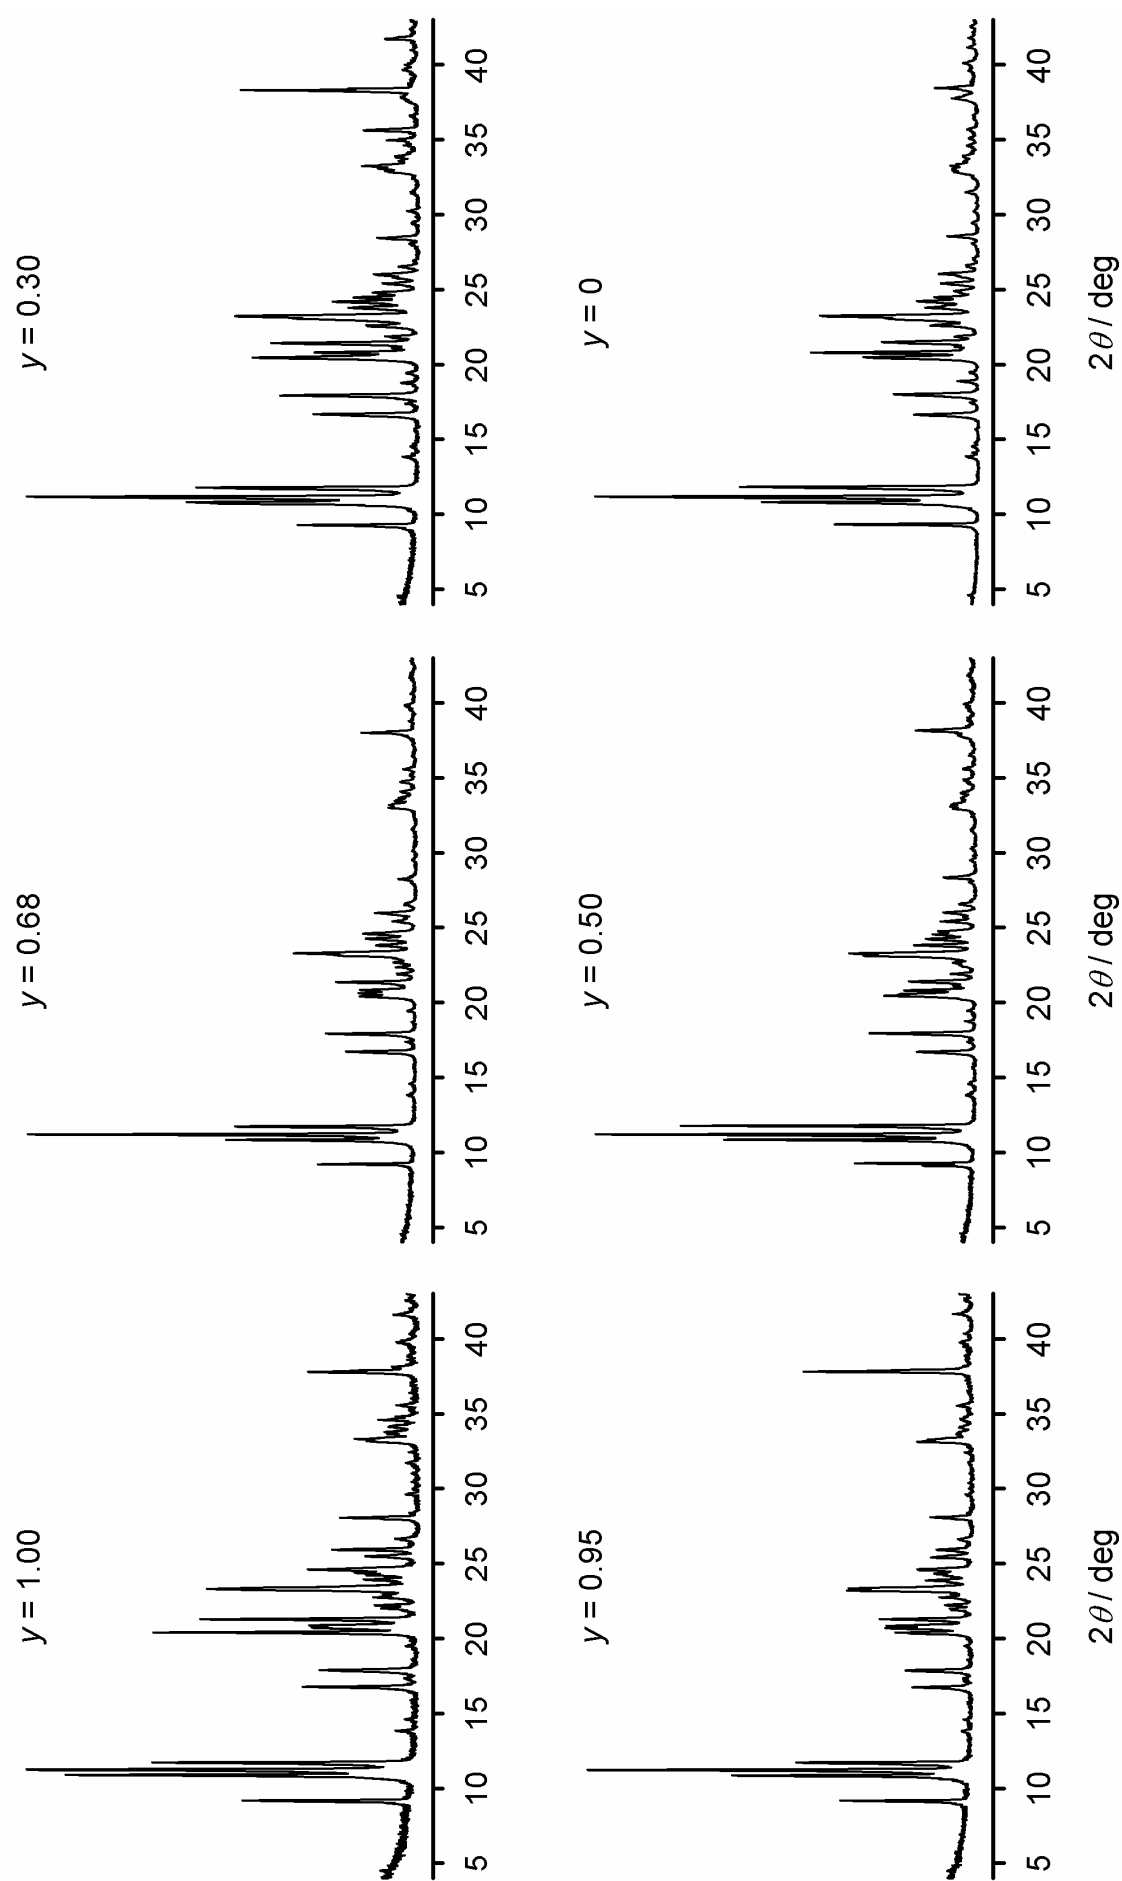

**Figure S7** Selected powder diffraction data from the  $[\text{Fe}_y\text{Ni}_{1-y}(\text{bpb})_2][\text{BF}_4]_2$  compounds in this work (298 K, Cu- $K\alpha$  radiation).
